# Supplementary material for: Implementation of Proximal and Remote Soil Sensing, Data Fusion and Machine Learning to Improve Phosphorus Spatial Prediction for Farms in Ontario, Canada
Source: MDPI journal article supplement (doi:10.3390/agronomy14040693), 2024-03-27
Supplement: s1 [file s1]

Archive with 1 entries (1 files):
- agronomy-2877519-supplementary.pdf
